# Supplementary material
Source: MDPI journal article supplement (https://www.mdpi.com/2313-0105/8/11/239)
Supplement: s1 [file s1]

## Article

# Phase Transformation Activated $\text{MnCO}_3$ as Cathode Material of Aqueous Zinc-ion Batteries

Funian Mo <sup>1,\*</sup>, Mangwei Cui <sup>1,‡</sup>, Liangliang Yang <sup>1,‡</sup>, Hao Lei <sup>1</sup>, Sheng Chen <sup>1</sup>, Jun Wei <sup>1,\*</sup> and Litao Kang <sup>2,\*</sup><sup>1</sup> Shenzhen Key Laboratory of Flexible Printed Electronics Technology Center, School of Materials Science and Engineering, Harbin Institute of Technology, Shenzhen, People's Republic of China<sup>2</sup> College of Environment and Materials Engineering, Yantai University, Yantai 264005, China

\* Correspondence: mofunian@hit.edu.cn; kanglitao@ytu.edu.cn

<sup>‡</sup> F.N. Mo, M.W. Cui and L.L. Yang contributed equally to this paper and are co-first authors.

**Citation:** Mo, F.; Cui, M.; Yang, L.; Lei, H.; Chen, S.; Wei, J.; Kang, L. Phase-Transformation-Activated  $\text{MnCO}_3$  as Cathode Material of Aqueous Zinc-Ion Batteries. *Batteries* **2022**, *8*, 239. <https://doi.org/10.3390/batteries8110239>

Academic Editor: Andreas Jossen

Received: 27 September 2022

Accepted: 10 November 2022

Published: 15 November 2022

**Publisher's Note:** MDPI stays neutral with regard to jurisdictional claims in published maps and institutional affiliations.

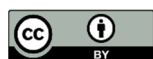

**Copyright:** © 2022 by the authors. Licensee MDPI, Basel, Switzerland. This article is an open access article distributed under the terms and conditions of the Creative Commons Attribution (CC BY) license (<http://creativecommons.org/licenses/by/4.0/>).

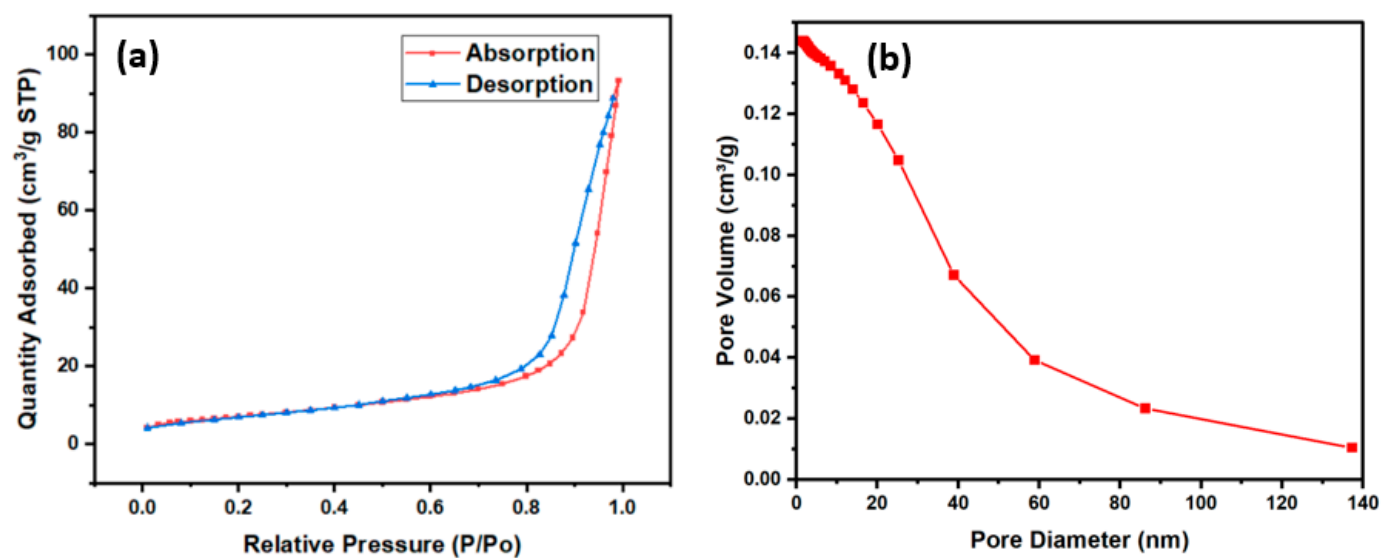

Figure S1 (a) BET adsorption/desorption curves and (b) BJH Adsorption Cumulative Pore volume.

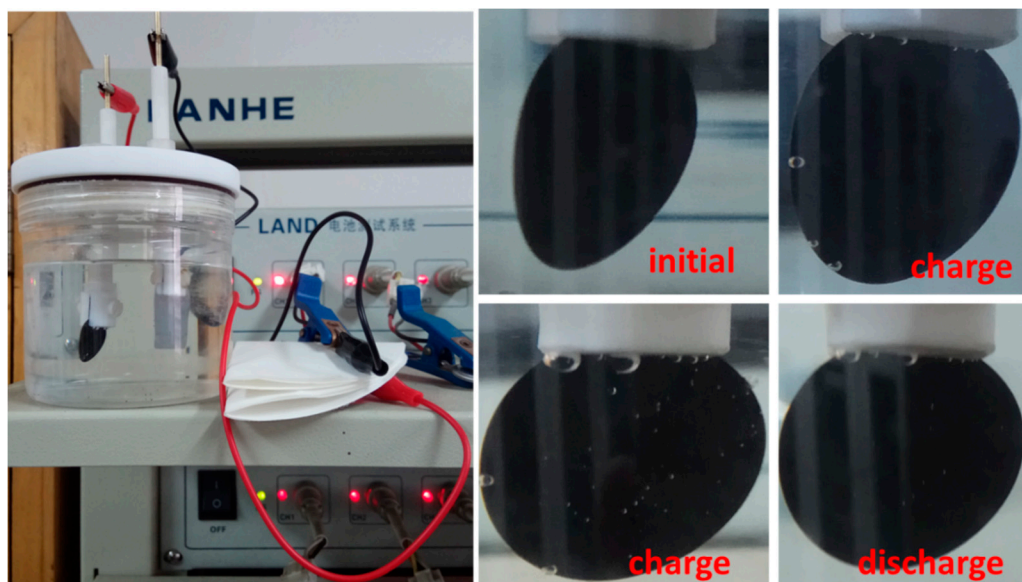

Figure S2 Change of electrode materials during 1st charge and discharge.

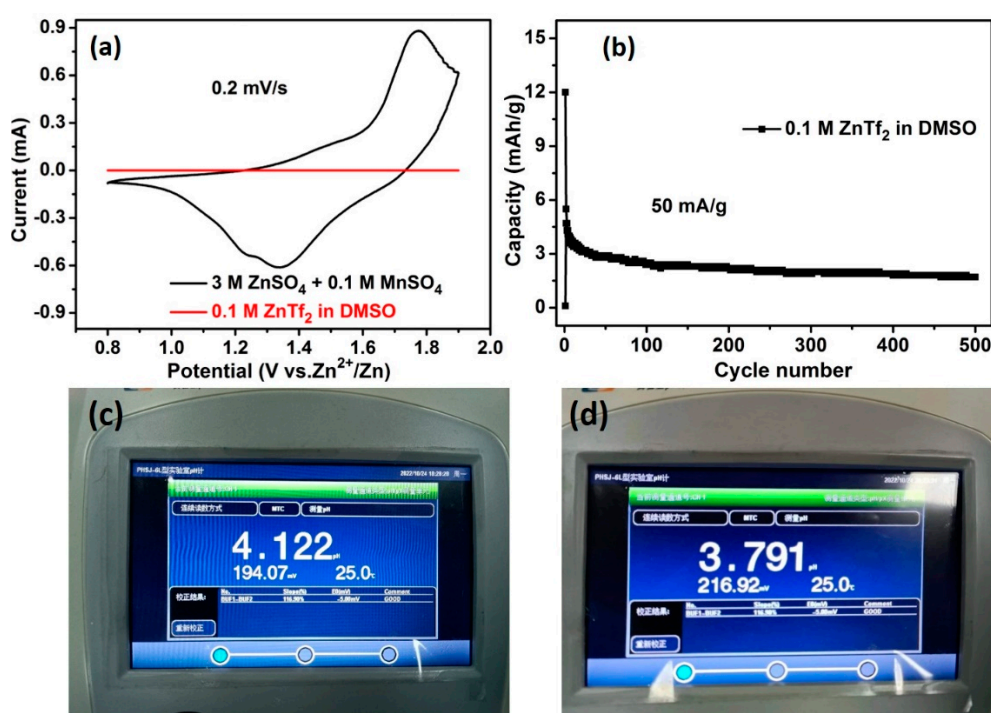

Figure S3. (a) Comparison of CV curves at 0.2 mV s<sup>-1</sup> in 3 M ZnSO<sub>4</sub>+0.1 M MnSO<sub>4</sub> and 0.1 M ZnTf<sub>2</sub> in DMSO; (b) the cycling performance at 50 mA g<sup>-1</sup> in 0.1 M ZnTf<sub>2</sub> in DMSO; (c) the pH value of 3 M ZnSO<sub>4</sub> + 0.1 M MnSO<sub>4</sub>; (d) the pH of electrolyte after cycle.

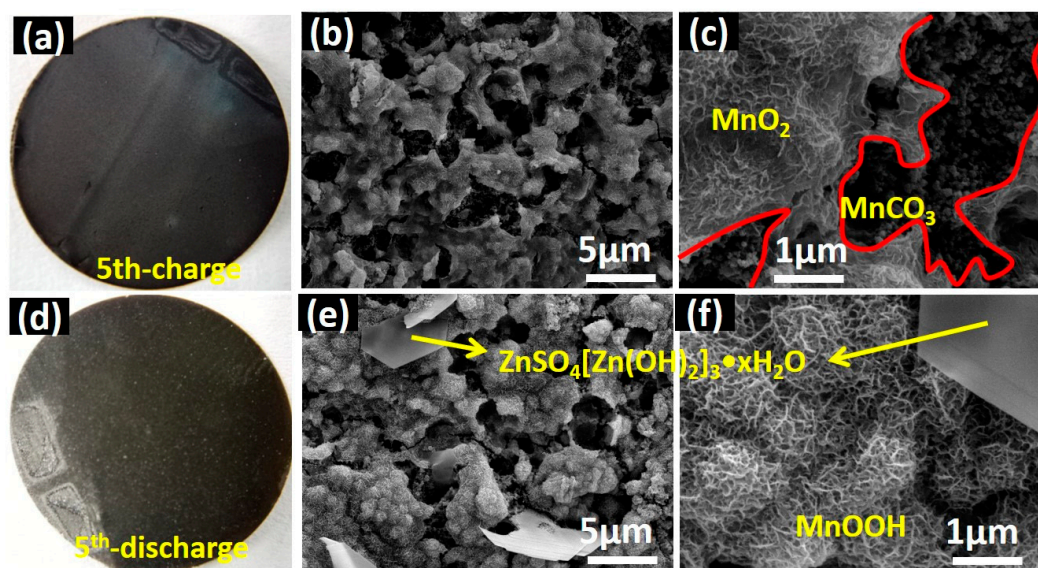

Figure S4. Change of electrode materials during 5th charge and discharge. (a) Image of 5th charge MnCO<sub>3</sub> electrode; (b-c) SEM of MnCO<sub>3</sub> electrode after 5th-charge; (d) Image of 5th discharge MnCO<sub>3</sub> electrode; (e-f) SEM of MnCO<sub>3</sub> electrode after 5th-discharge.

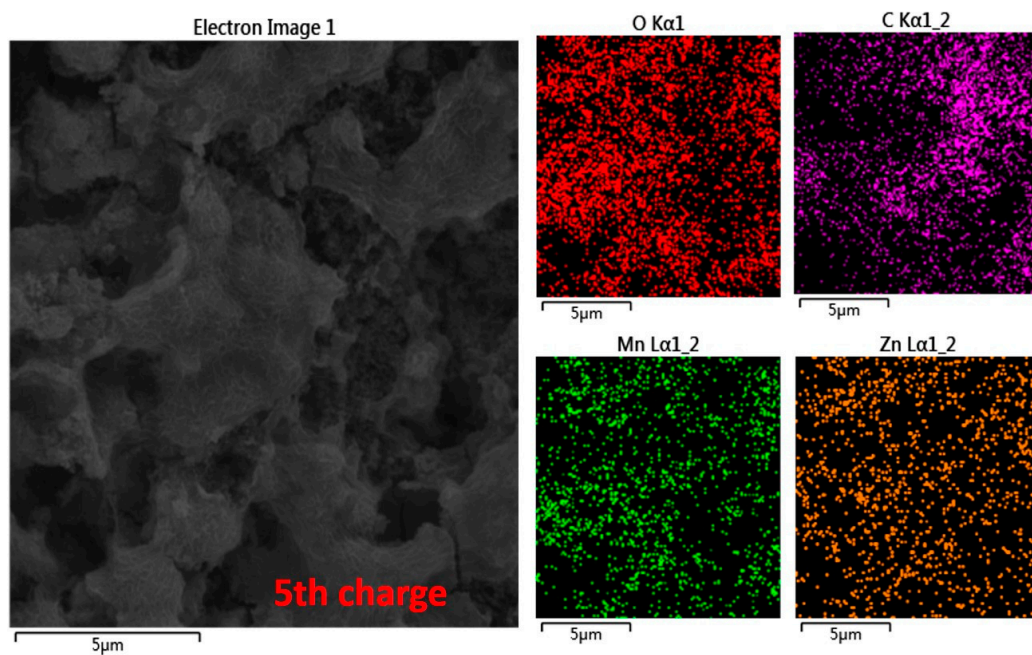

Figure S5. EDS of 5th charge corresponding to MnCO<sub>3</sub> electrode.

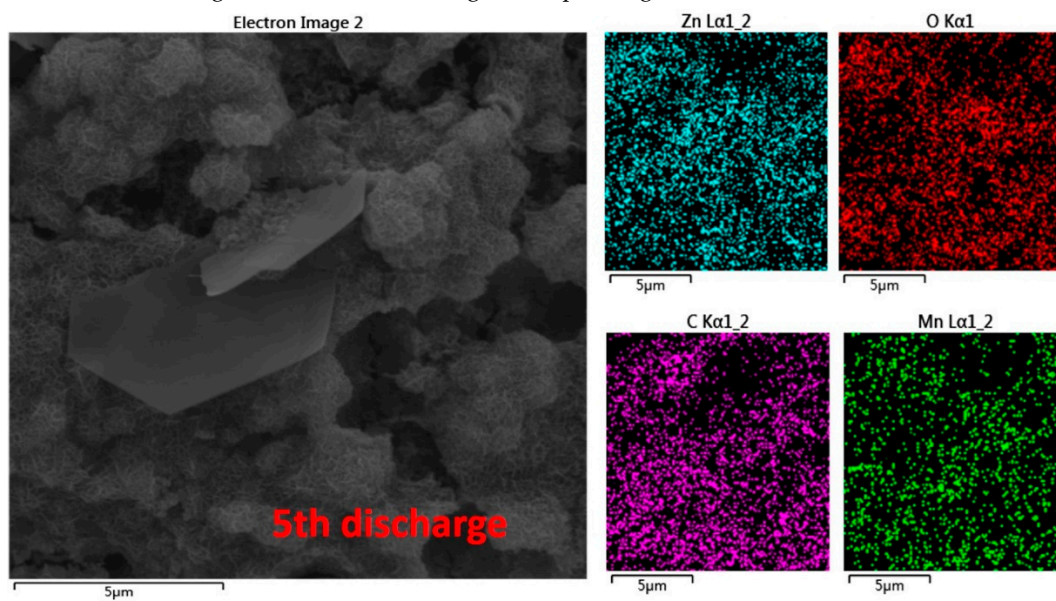

Figure S6. EDS of 5th discharge corresponding to MnCO<sub>3</sub> electrode.
